# Supplementary material for: Sex-influenced DNA methylation differs by placental cell type
Source: Biol Sex Differ. 2026 Mar 18;17:98. doi: 10.1186/s13293-026-00869-x (PMC13147677; doi:10.1186/s13293-026-00869-x)
Supplement: Supplementary file 1 — Supplementary Material 1. [file 13293_2026_869_MOESM1_ESM.xlsx]

## Sheet: Supplementary table 1
Supplementary table 1 - Number of cells and matched chorionic villus samples from term placentas .
Trimester	Cell type	XX	XY
Third	Endothelial	10	9
	Stromal	10	9
	Hofbauer	10	8
	Cytotrophoblast	10	9
	Villi (bulk tissue)	10	9
	Total	50	44

## Sheet: Supplementary table 2
Supplementary table 2 - Proportion of X-chromosome CpGs in different DNAme levels.
The number of X-chromosome CpGS in XX cells Total nCpGs = 14,766
DNAme levels	Low (β ≤ 0.2)	Intermediate (0.2 < β ≤ 0.8 )	High (β > 0.8)
Endothelial cells	2718 (18.4%)	5911 (40.0%)	6137 (41.6%)
Stromal cells	2901 (19.6%)	6077 (41.2%)	5788 (39.2%)
Hofbauer cells	4257 (28.8%)	8497 (57.5%)	2012 (13.6%)
Cytotrophoblast	1633 (11.1%)	9010 (61.0%)	4123 (27.9%)
Pearson’s Chi-squared test		X-squared = 5338.9	p-value < 2.2e-16
The number of X-chromosome CpGS in XY cells Total nCpGs = 14,766
DNAme levels	Low (β ≤ 0.2)	Intermediate (0.2 < β ≤ 0.8 )	High (β > 0.8)
Endothelial cells	4431 (30.0 %)	3937 (26.7 %)	6398 (43.3 %)
Stromal cells	4479 (30.3 %)	3925 (26.6 %)	6362 (43.1 %)
Hofbauer cells	5965 (40.4 %)	2913 (19.7 %)	5888 (39.9 %)
Cytotrophoblast	4001 (27.1 %)	5361 (36.3 %)	5404 (36.6 %)
Pearson’s Chi-squared test		X-squared = 1585.4	p-value < 2.2e-16

## Sheet: Supplementary table 3
Supplementary table 3 - Significant sex-influenced DMCs of X-chromosomes in placental cells of ∆β > |0.1| and FDR < 0.05
Cell type	Total DMCs (n)	Higher in XX	Higher in XY
Endothelial cells	4648	1060 (22.8%)	3588 (77.2%)
Stromal cells	4982	1619 (32.7%)	3363 (67.3%)
Hofbauer cells	8113	5011 (61.7%)	3102 (38.2%)
Cytotrophoblast	8057	2976 (36.9%)	5081 (63.1%)
Villi	7626	2842 (37.2%)	4784 (62.7%)

## Sheet: Supplementary table 4
Supplementary table 4 - Number of term placental and umbilical endothelial cells.
Trimester	Cell type	XX	XY
Third	Placental arterial endothelial	7	5
	Placental venous endothelial	9	8
	Umbilical venous endothelial	22	14
	Total	38	27

## Sheet: Supplementary table 5
Supplementary table 5 - Significant cell-influenced DMCs and annotated genes in the Y-chromosome
probeID	Cell typ	delß	p.value	fdr	pos	UCSC_RefGene_Name	Regulatory_Region		DNAme direction
cg01988452	HofvsOthers	0.346806	5.94456e-14	1.16117e-12	22736528	EIF1AY	Intergenic		Higher
cg01988452	StrovsOthers	-0.314004	3.82189e-16	2.23963e-14	22736528	EIF1AY	Intergenic		Lower
cg04064200	HofvsOthers	0.739741	1.08001e-23	1.58221e-21	2805939	ZFY;ZFY;ZFY	Gene body		Higher
cg04064200	StrovsOthers	-0.34939	2.06584e-15	8.64702e-14	2805939	ZFY;ZFY;ZFY	Gene body		Lower
cg04064200	CytovsOthers	-0.355625	1.64457e-16	1.20465e-14	2805939	ZFY;ZFY;ZFY	Gene body		Lower
cg05812602	StrovsOthers	-0.101633	0.00134327	0.00437309	14921042	USP9Y	Gene body		Lower
cg06907892	EndovsOthers	-0.117426	0.00293364	0.00955063	14532343	GYG2P1	Intergenic		Lower
cg07870295	EndovsOthers	-0.26957	1.04243e-10	2.18166e-09	2709075	RPS4Y1	Intergenic		Lower
cg07870295	HofvsOthers	0.705844	2.18405e-21	1.59982e-19	2709075	RPS4Y1	Intergenic		Higher
cg07870295	StrovsOthers	-0.259749	4.38924e-10	5.35853e-09	2709075	RPS4Y1	Intergenic		Lower
cg07870295	CytovsOthers	-0.176525	0.000117414	0.000279693	2709075	RPS4Y1	Intergenic		Lower
cg08673225	EndovsOthers	-0.265645	3.83637e-13	1.87343e-11	2708972	RPS4Y1	Intergenic		Lower
cg08673225	HofvsOthers	0.779246	1.27278e-26	3.72926e-24	2708972	RPS4Y1	Intergenic		Higher
cg08673225	StrovsOthers	-0.274419	3.30604e-14	9.6867e-13	2708972	RPS4Y1	Intergenic		Lower
cg08673225	CytovsOthers	-0.239182	1.36826e-09	9.32327e-09	2708972	RPS4Y1	Intergenic		Lower
cg09829904	EndovsOthers	-0.431258	1.18925e-16	3.4845e-14	2823782	ZFY;ZFY;ZFY	Gene body		Lower
cg09829904	HofvsOthers	0.248501	1.36529e-13	2.35311e-12	2823782	ZFY;ZFY;ZFY	Gene body		Higher
cg09829904	CytovsOthers	0.183466	3.86398e-07	1.74177e-06	2823782	ZFY;ZFY;ZFY	Gene body		Higher
cg10593480	HofvsOthers	0.250553	7.92216e-13	1.22168e-11	22738771	EIF1AY	Gene body		Higher
cg10593480	StrovsOthers	-0.111858	6.92312e-06	3.55873e-05	22738771	EIF1AY	Gene body		Lower
cg13308744	HofvsOthers	0.581891	1.63295e-21	1.59485e-19	22736584	EIF1AY	Intergenic		Higher
cg13308744	StrovsOthers	-0.436225	1.13533e-20	1.66326e-18	22736584	EIF1AY	Intergenic		Lower
cg13308744	CytovsOthers	-0.168008	0.000125716	0.000294679	22736584	EIF1AY	Intergenic		Lower
cg13468374	EndovsOthers	-0.319426	2.83138e-12	1.0034e-10	22748090	EIF1AY;EIF1AY	Gene body		Lower
cg13468374	HofvsOthers	0.393178	1.54234e-16	4.51905e-15	22748090	EIF1AY;EIF1AY	Gene body		Higher
cg13468374	StrovsOthers	-0.279811	3.47747e-11	5.66054e-10	22748090	EIF1AY;EIF1AY	Gene body		Lower
cg13468374	CytovsOthers	0.206059	5.67492e-05	0.000147146	22748090	EIF1AY;EIF1AY	Gene body		Higher
cg14170959	EndovsOthers	-0.201835	4.09639e-07	4.80097e-06	2802217	ZFY;ZFY;ZFY	Gene body		Lower
cg14170959	HofvsOthers	0.376199	1.19625e-11	1.2845e-10	2802217	ZFY;ZFY;ZFY	Gene body		Higher
cg14170959	CytovsOthers	-0.194208	1.51646e-07	7.28398e-07	2802217	ZFY;ZFY;ZFY	Gene body		Lower
cg14446584	EndovsOthers	-0.173341	1.69706e-06	1.71462e-05	14822618	USP9Y	Gene body		Lower
cg14446584	HofvsOthers	0.418879	8.65391e-17	2.81733e-15	14822618	USP9Y	Gene body		Higher
cg14446584	StrovsOthers	-0.259339	5.00137e-15	1.62823e-13	14822618	USP9Y	Gene body		Lower
cg14526044	EndovsOthers	-0.419383	3.08211e-12	1.0034e-10	2802103	ZFY;ZFY;ZFY	Intergenic		Lower
cg14526044	HofvsOthers	0.41715	5.82327e-12	6.82487e-11	2802103	ZFY;ZFY;ZFY	Intergenic		Higher
cg14526044	StrovsOthers	0.418905	1.41383e-12	2.87106e-11	2802103	ZFY;ZFY;ZFY	Intergenic		Higher
cg14526044	CytovsOthers	-0.416673	9.42819e-13	1.31546e-11	2802103	ZFY;ZFY;ZFY	Intergenic		Lower
cg14972466	EndovsOthers	-0.132785	9.26794e-06	7.75859e-05	2802332	ZFY;ZFY;ZFY	Gene body		Lower
cg14972466	HofvsOthers	0.361762	1.47749e-15	3.33003e-14	2802332	ZFY;ZFY;ZFY	Gene body		Higher
cg14972466	CytovsOthers	-0.176842	2.82194e-08	1.59005e-07	2802332	ZFY;ZFY;ZFY	Gene body		Lower
cg17816615	EndovsOthers	-0.330255	1.24431e-11	3.03818e-10	15019332	DDX3Y;DDX3Y	Gene body		Lower
cg17816615	HofvsOthers	0.376513	3.11202e-12	3.96444e-11	15019332	DDX3Y;DDX3Y	Gene body		Higher
cg17816615	StrovsOthers	-0.176019	3.70452e-05	0.000159621	15019332	DDX3Y;DDX3Y	Gene body		Lower
cg17816615	CytovsOthers	0.12976	0.000612605	0.00126404	15019332	DDX3Y;DDX3Y	Gene body		Higher
cg18058072	EndovsOthers	-0.109363	1.5539e-05	0.000116741	2807288	ZFY;ZFY;ZFY	Gene body		Lower
cg18058072	HofvsOthers	0.102098	1.76085e-05	5.54762e-05	2807288	ZFY;ZFY;ZFY	Gene body		Higher
cg18168924	HofvsOthers	0.338627	1.56428e-12	2.28824e-11	7177888	PRKY	Gene body		Higher
cg18168924	StrovsOthers	-0.480918	1.41592e-15	6.91443e-14	7177888	PRKY	Gene body		Lower
cg18168924	CytovsOthers	0.199321	7.99915e-06	2.66335e-05	7177888	PRKY	Gene body		Higher
cg19825714	HofvsOthers	-0.169638	1.75831e-16	4.68349e-15	21878594	KDM5D;KDM5D;KDM5D;KDM5D;KDM5D;KDM5D	Gene body		Lower
cg20048186	HofvsOthers	0.124362	0.00101468	0.00247751	14820353	USP9Y	Gene body		Higher
cg20048186	CytovsOthers	-0.142186	0.000849326	0.00169287	14820353	USP9Y	Gene body		Lower
cg24074981	EndovsOthers	-0.162439	1.14978e-09	2.24591e-08	15016006	DDX3Y;DDX3Y	Intergenic		Lower
cg24074981	HofvsOthers	0.117201	3.32593e-09	2.32023e-08	15016006	DDX3Y;DDX3Y	Intergenic		Higher
cg25032547	HofvsOthers	0.100351	5.49e-12	6.70238e-11	14773536	TTTY15	Gene body		Higher

## Sheet: Supplementary table 6
Supplementary table 6 - Significant sex-DMCs and annotated genes of the endothelial cells in autosomes.
probeID	estimate	p.value	fdr	log_p.value	delß	chr	pos	strand	UCSC_RefGene_Name	UCSC_RefGene_Accession	UCSC_RefGene_Group	DMR	Islands_Name	Relation_to_Island	Regulatory_Region
cg06766960	2.05289	9.33e-08	0.0114083	7.03024	0.243974	chr11	133703094	+					chr11:133703052-133703708	Island	Intergenic
cg25294185	2.57379	2.84e-11	2.09e-05	10.5466	0.121116	chr11	65487814	-	RNASEH2C	NM_032193	Body		chr11:65487660-65488348	Island	Promoter
cg26387297	1.88035	7.8e-07	0.0265248	6.10775	0.227302	chr13	47012328	+					chr13:47012102-47012440	Island	Promoter
cg19286437	1.73403	2.51e-06	0.041104	5.6004	0.186584	chr10	88428117	+	LDB3;LDB3;LDB3;LDB3;LDB3;LDB3	NM_001080114;NM_001171611;NM_001171610;NM_001080115;NM_001080116;NM_007078	TSS1500;TSS1500;TSS200;TSS1500;TSS1500;TSS1500			OpenSea	Enhancer
cg26486466	2.72051	1.06e-06	0.0280958	5.97407	0.105702	chr5	150284616	+	ZNF300;ZNF300;ZNF300	NM_052860;NM_001172832;NM_001172831	TSS200;TSS200;TSS200		chr5:150284385-150284635	Island	Promoter
cg18121224	-1.61823	1.76e-06	0.0340435	5.75568	-0.153554	chr5	176559563	-	NSD1;NSD1	NM_022455;NM_172349	TSS1500;TSS1500		chr5:176558852-176561652	Island	Promoter
cg19731612	-1.47566	1.92e-06	0.0352971	5.7177	-0.159149	chr5	176559334	-	NSD1;NSD1	NM_022455;NM_172349	TSS1500;TSS1500		chr5:176558852-176561652	Island	Promoter
cg10661558	-1.35201	5.5e-09	0.00101412	8.25935	-0.179563	chr21	15443159	+					chr21:15442956-15443160	Island	Gene body
cg07381872	0.862127	6.56e-07	0.0265248	6.18317	0.141731	chr1	61408076	-						OpenSea	Enhancer
cg06027043	1.87498	7.18e-07	0.0265248	6.14405	0.187092	chr16	24621578	-						OpenSea	Promoter
cg20058687	1.31732	1.82e-06	0.0343854	5.74006	0.195625	chr13	27129860	+					chr13:27131568-27132677	N_Shore	Intergenic
cg07913923	2.74677	2.62e-06	0.0411239	5.58131	0.145813	chr16	29086263	-	RRN3P2	NR_003369	Body	DMR	chr16:29086220-29086434	Island	Promoter
cg20590617	2.48658	7.18e-07	0.0265248	6.1438	0.142771	chr12	131201268	-				DMR	chr12:131199824-131200157	S_Shore	Promoter
cg06342317	1.2824	2.33e-06	0.039077	5.63212	0.161783	chr2	121105259	+	INHBB	NM_002193	Body		chr2:121106946-121107536	N_Shore	Promoter
cg18814808	1.18493	1.33e-06	0.0296781	5.87655	0.193956	chr5	143698198	-	KCTD16	NM_020768	Body			OpenSea	Enhancer
cg18507138	1.03618	9.57e-07	0.0271204	6.01923	0.104838	chr3	26665242	+	LRRC3B	NM_052953	5'UTR	DMR	chr3:26665950-26666164	N_Shore	Promoter
cg24859092	1.12568	1.73e-06	0.0340435	5.76096	0.17838	chr1	160624653	-						OpenSea	Enhancer
cg08580836	2.4612	6.59e-07	0.0265248	6.18135	0.13344	chr5	150284448	+	ZNF300	NM_052860	TSS200		chr5:150284385-150284635	Island	Promoter
cg01815626	1.28031	2.03e-06	0.036451	5.693	0.12749	chr12	52890212	+						OpenSea	Promoter
cg14577902	0.973254	7.05e-07	0.0265248	6.15188	0.147692	chr1	22643804	-						OpenSea	Enhancer
cg05544660	1.00128	3.07e-06	0.0471851	5.51245	0.141971	chr17	1159451	+					chr17:1163341-1163773	N_Shelf	Gene body
cg01558242	1.34266	3.1e-07	0.0224821	6.50842	0.148328	chr20	57926211	+						OpenSea	Promoter
cg11730618	2.2112	5.38e-07	0.0265248	6.26952	0.194552	chr3	128444529	-	RAB7A	NM_004637	TSS1500		chr3:128444900-128445650	N_Shore	Promoter
cg00776666	1.05492	8.64e-07	0.0265248	6.06363	0.112134	chr2	107997704	-						OpenSea	Gene body
cg13338798	1.89717	1.08e-06	0.0280958	5.96506	0.129464	chr6	28557846	+					chr6:28554863-28555124	S_Shelf	Promoter
cg10848692	1.02341	2.29e-06	0.039077	5.64042	0.108014	chr14	96301924	+						OpenSea	Intergenic
cg12777992	1.81426	9.5e-07	0.0271204	6.02218	0.130553	chr5	150284634	+	ZNF300;ZNF300;ZNF300	NM_052860;NM_001172832;NM_001172831	TSS200;TSS200;TSS200		chr5:150284385-150284635	Island	Promoter
cg08194323	1.49893	2.58e-06	0.0411239	5.58814	0.101354	chr19	50862004	-	NAPSA	NM_004851	Body		chr19:50861773-50862083	Island	Promoter
cg18286285	1.2212	2.13e-07	0.0174428	6.67164	0.170021	chr10	88428247	-	LDB3;LDB3;LDB3;LDB3;LDB3;LDB3;LDB3	NM_001080115;NM_001080116;NM_001171610;NM_001171611;NM_001171610;NM_001080114;NM_007078	TSS200;TSS200;1stExon;TSS200;5'UTR;TSS200;TSS200			OpenSea	Enhancer
cg22660171	1.37834	1.27e-06	0.0296532	5.89663	0.133846	chr8	30770617	+					chr8:30769264-30770122	S_Shore	Promoter
cg09829303	-1.93928	4.38e-09	0.00101412	8.35884	-0.196007	chr7	134419774	-						OpenSea	Gene body
cg12385553	1.78184	1.06e-08	0.00156554	7.97386	0.210453	chr22	17256079	+						OpenSea	Intergenic
cg03468041	1.08681	8.48e-07	0.0265248	6.07182	0.126962	chr14	75688953	+						OpenSea	Enhancer
cg04032578	1.88244	1.43e-06	0.0310049	5.84459	0.167451	chr5	150284619	+	ZNF300;ZNF300;ZNF300	NM_052860;NM_001172832;NM_001172831	TSS200;TSS200;TSS200		chr5:150284385-150284635	Island	Promoter
cg23538438	1.32163	2.18e-06	0.0382268	5.66188	0.146329	chr3	43960634	+						OpenSea	Enhancer
